1 **Title: Detecting the impact of temperature on transmission of Zika, dengue and**  
2 **chikungunya using mechanistic models**

3

4 **Short title:** Temperature predicts Zika, dengue, and chikungunya transmission

5 **Authors:** Erin A. Mordecai<sup>a\*</sup>, Jeremy M. Cohen<sup>b</sup>, Michelle V. Evans<sup>c</sup>, Prithvi Gudapati<sup>a</sup>, Leah  
6 R. Johnson<sup>b</sup>, Catherine A. Lippi<sup>c</sup>, Kerri Miazgowicz<sup>d</sup>, Courtney C. Murdock<sup>d,e</sup>, Jason R. Rohr<sup>b</sup>,  
7 Sadie J. Ryan<sup>c,f,g,h</sup>, Van Savage<sup>i,j</sup>, Marta S. Shocket<sup>a,k</sup>, Anna Stewart Ibarra<sup>l</sup>, Matthew B.  
8 Thomas<sup>m</sup>, Daniel P. Weikel<sup>n</sup>

9 **Affiliations:**

10 <sup>a</sup>Biology Department, Stanford University, 371 Serra Mall, Stanford, CA 94305

11 <sup>b</sup>Department of Integrative Biology, University of South Florida, 4202 East Fowler Ave,  
12 SCA110 Tampa, FL 33620

13 <sup>c</sup>Department of Geography, University of Florida, PO Box 117315, Turlington Hall, Gainesville,  
14 FL 32611

15 <sup>d</sup>Center for Tropical and Emerging Global Disease, Department of Infectious Diseases,  
16 University of Georgia College of Veterinary Medicine, 501 D.W. Brooks Drive, Athens, GA  
17 30602

18 <sup>e</sup>Odum School of Ecology, University of Georgia, 140 E. Green St., Athens, GA

19 30602<sup>f</sup>Emerging Pathogens Institute, University of Florida, P.O. Box 100009, 2055 Mowry Road  
20 Gainesville, FL 32610

21 <sup>g</sup>Center for Global Health and Translational Science, Department of Microbiology and  
22 Immunology, Weiskotten Hall, SUNY Upstate Medical University, Syracuse, NY 13210

23 <sup>h</sup>School of Life Sciences, College of Agriculture, Engineering, and Science, University of  
24 KwaZulu Natal, Private Bag X01, Scottsville, 3209, KwaZulu Natal, South Africa

25 <sup>i</sup>Department of Ecology and Evolutionary Biology, University of California Los Angeles and  
26 Department of Biomathematics, University of California Los Angeles, Los Angeles, CA 90095

27 <sup>j</sup>Santa Fe Institute, 1399 Hyde Park Rd, Santa Fe, NM 87501

28 <sup>k</sup>Department of Biology, Indiana University, 1001 E. 3rd St., Jordan Hall 142, Bloomington, IN  
29 47405

30 <sup>l</sup>Center for Global Health and Translational Sciences, SUNY Upstate Medical University,  
31 Syracuse, NY13210

32 <sup>m</sup>Department of Entomology and Center for Infectious Disease Dynamics, Penn State University,  
33 112 Merkle Lab, University Park, PA 16802

34 <sup>n</sup>Department of Biostatistics, University of Michigan, 1415 Washington Heights, Ann Arbor, MI  
35 48109

36 \*Correspondence to: Erin Mordecai. Biology Department, Stanford University, 371 Serra Mall,  
37 Stanford, CA 94305. (650) 497-7447. [emordeca@stanford.edu](mailto:emordeca@stanford.edu)

38 **Keywords:** Zika, dengue, chikungunya, temperature, vector transmission, *Aedes aegypti*, *Aedes*  
39 *albopictus*

40

41

42 **Abstract**

43 Recent epidemics of Zika, dengue, and chikungunya have heightened the need to understand the  
44 seasonal and geographic range of transmission by *Aedes aegypti* and *Ae. albopictus* mosquitoes.  
45 We use mechanistic transmission models to derive predictions for how the probability and  
46 magnitude of transmission for Zika, chikungunya, and dengue change with mean temperature,  
47 and we show that these predictions are well matched by human case data. Across all three  
48 viruses, models and human case data both show that transmission occurs between 18-34°C with  
49 maximal transmission occurring in a range from 26-29°C. Controlling for population size and  
50 two socioeconomic factors, temperature-dependent transmission based on our mechanistic model  
51 is an important predictor of human transmission occurrence and incidence. Risk maps indicate  
52 that tropical and subtropical regions are suitable for extended seasonal or year-round  
53 transmission, but transmission in temperate areas is limited to at most three months per year even  
54 if vectors are present. Such brief transmission windows limit the likelihood of major epidemics  
55 following disease introduction in temperate zones.

56

57 **Author Summary (150-200 words)**

58 Understanding the drivers of recent Zika, dengue, and chikungunya epidemics is a major public  
59 health priority. Temperature may play an important role because it affects mosquito  
60 transmission, affecting mosquito development, survival, reproduction, and biting rates as well as  
61 the rate at which they acquire and transmit viruses. Here, we measure the impact of temperature  
62 on transmission by two of the most common mosquito vector species for these viruses, *Aedes*  
63 *aegypti* and *Ae. albopictus*. We integrate data from several laboratory experiments into a  
64 mathematical model of temperature-dependent transmission, and find that transmission peaks at

65 26-29°C and can occur between 18-34°C. Statistically comparing model predictions with recent  
66 observed human cases of dengue, chikungunya, and Zika across the Americas suggests an  
67 important role for temperature, and supports model predictions. Using the model, we predict that  
68 most of the tropics and subtropics are suitable for transmission in many or all months of the year,  
69 but that temperate areas like most of the United States are only suitable for transmission for a  
70 few months during the summer (even if the mosquito vector is present).

71

72 **Main Text**

73 Epidemics of dengue, chikungunya, and Zika are sweeping through the Americas, and are part of  
74 a global public health crisis that places an estimated 3.9 billion people in 120 countries at risk  
75 [1]. Dengue virus (DENV) distribution and intensity in the Americas has increased over the last  
76 three decades, infecting an estimated 390 million people (96 million clinical) per year [2].  
77 Chikungunya virus (CHIKV) emerged in the Americas in 2013, causing 1.8 million suspected  
78 cases from 44 countries and territories ([www.paho.org](http://www.paho.org)). In the last two years, Zika virus (ZIKV)  
79 has spread throughout the Americas, causing 714,636 suspected and confirmed cases, with many  
80 more unreported ([http://ais.paho.org/phis/viz/ed\\_zika\\_cases.asp](http://ais.paho.org/phis/viz/ed_zika_cases.asp), as of January 5, 2017). The  
81 growing burden of these diseases (including links between Zika infection and both microcephaly  
82 and Guillain-Barré syndrome [3]) and potential for spread into new areas creates an urgent need  
83 for predictive models that can inform risk assessment and guide interventions such as mosquito  
84 control, community outreach, and education.

85 Predicting transmission of DENV, CHIKV, and ZIKV requires understanding the  
86 ecology of the vector species. For these viruses the main vector is *Aedes aegypti*, a mosquito that  
87 prefers and is closely affiliated with humans, while *Ae. albopictus*, a peri-urban mosquito, is an  
88 important secondary vector [4,5]. We expect one of the main drivers of the vector ecology to be  
89 the climate, particularly temperature. For that reason, mathematical and geostatistical models that  
90 incorporate climate information have been valuable for predicting and responding to *Aedes* spp.  
91 spread and DENV, CHIKV, and ZIKV outbreaks [5–10].

92 The effects of temperature in ectotherms are largely predictable from fundamental  
93 metabolic and ecological processes. Survival, feeding, development, and reproductive rates  
94 predictably respond to temperature across a variety of ectotherms, including mosquitoes [11,12].

95 Because these traits help to determine transmission rates, the effects of temperature on  
96 transmission should also be broadly predictable from mechanistic models that incorporate  
97 temperature-dependent traits. Here, we introduce a model based on this framework that  
98 overcomes several major gaps that currently limit our understanding of climate suitability for  
99 transmission. Specifically, we develop models of temperature-dependent transmission for *Ae.*  
100 *aegypti* and *Ae. albopictus* that are (a) mechanistic, facilitating extrapolation beyond the current  
101 disease distribution, (b) parameterized with biologically accurate unimodal thermal responses for  
102 all mosquito and virus traits that drive transmission, and (c) validated against human dengue,  
103 chikungunya, and Zika case data across the Americas.

104 We synthesize available data to characterize the temperature-dependent traits of the  
105 mosquitoes and viruses that determine transmission intensity. With these thermal responses, we  
106 develop mechanistic temperature-dependent virus transmission models for *Ae. aegypti* and *Ae.*  
107 *albopictus*. We then ask whether the predicted effect of temperature on transmission is consistent  
108 with patterns of actual human cases over space and time. To do this, we validate the models with  
109 DENV, CHIKV, and ZIKV human incidence data at the country scale from the Americas from  
110 2014-2016. To isolate temperature dependence, we also statistically controlled for population  
111 size and two socioeconomic factors that may influence transmission. If temperature  
112 fundamentally limits transmission potential, transmission should only occur at actual  
113 environmental temperatures that are predicted to be suitable, and conversely, areas with low  
114 predicted suitability should have low or zero transmission (i.e., false negative rates should be  
115 low). By contrast, low transmission may occur even when temperature suitability is high because  
116 other factors like vector control can limit transmission (i.e., the false positive rate should be  
117 higher than the false negative rate). Finally, if the simple mechanistic model accurately predicts

118 climate suitability for transmission, then we can use it to map climate-based transmission risk of  
119 DENV, CHIKV, ZIKV, and other emerging pathogens transmitted by *Ae. aegypti* and *Ae.*  
120 *albopictus* seasonally and geographically.

## 121 **Results**

### 122 Temperature-dependent transmission

123 Data gathered from the literature [9,13–15,15–21,21–30] revealed that all mosquito traits  
124 relevant to transmission—biting rate, egg-to-adult survival and development rate, adult lifespan,  
125 and fecundity—respond strongly to temperature and peak between 23°C and 34°C for the two  
126 mosquito species (*Ae. aegypti* in Fig. 1 and *Ae. albopictus* in Fig. S1). DENV extrinsic  
127 incubation and vector competence peak at 35°C [31–37] and 31–32°C [31,32,34,38],  
128 respectively, in both mosquitoes—temperatures at which mosquito survival is low, limiting  
129 transmission potential (Figs. 1, S1). Appropriate thermal response data were not available for  
130 CHIKV and ZIKV extrinsic incubation and vector competence.

131

132 **Fig. 1.** Thermal responses of *Ae. aegypti* and DENV traits that drive transmission (data sources  
133 listed in Table S2). Informative priors based on data from additional *Aedes* spp. and flavivirus  
134 studies helped to constrain uncertainty in the model fits (see Materials and Methods; Table S3).  
135 Points and error bars indicate the data means and standard errors (for display only; models were  
136 fit from the raw data). Black solid lines are the mean model fits; red dashed lines are the 95%  
137 credible intervals. Thermal responses for *Ae. albopictus* are shown in Fig. S1.

138

139 We estimated the posterior distribution of  $R_0(T)$  and used it to calculate key temperature  
140 values that indicate suitability for transmission: the mean and 95% credible intervals (95% CI)  
141 on the critical thermal minimum, maximum, and optimum temperature for transmission by the  
142 two mosquito species. At constant temperature, *Ae. aegypti* transmission peaked at 29.1°C (95%  
143 CI: 28.4 – 29.8°C), and declined to zero below 17.8°C (95% CI: 14.6 – 21.2°C) and above  
144 34.6°C (95% CI: 34.1 – 35.6°C) (Fig. 2). *Ae. albopictus* transmission peaked at 26.4°C (95% CI:  
145 25.2 – 27.4°C) and declined to zero below 16.2°C (95% CI: 13.2 – 19.9°C) and above 31.6°C  
146 (95% CI: 29.4 – 33.7°C) (Fig. 2). Overall, the thermal response curve for *Ae. albopictus* is  
147 shifted towards lower temperatures than *Ae. aegypti*, so *Ae. albopictus* transmission is better  
148 suited to colder environments. For a more realistic scenario in which daily temperature ranged  
149 over 8°C, the transmission peak, minimum, and maximum were slightly lower for both *Ae.*  
150 *aegypti* (28.5°C, 13.5°C, 34.2°C, respectively) and *Ae. albopictus* (26.1°C, 11.9°C, and 28.3°C,  
151 respectively). The lower thermal maximum under fluctuating temperatures occurs because we  
152 incorporated empirically supported irreversible lethal effects of temperatures that exceed thermal  
153 maxima for survival (see Materials and Methods).

154

155 **Fig. 2.** Relative  $R_0$  across constant temperatures (°C; top) for *Ae. albopictus* (light blue) and *Ae.*  
156 *aegypti* (dark blue), and histograms of the posterior distributions of the critical thermal minimum  
157 (bottom left), temperature at peak transmission (bottom middle), and critical thermal maximum  
158 (bottom right; all in °C). Solid lines: mean posterior estimates; dashed lines: 95% credible  
159 intervals.  $R_0$  curves normalized to a 0-1 scale for ease of comparison and visualization.

160



161 The posterior distribution of  $R_0(T)$  allows us to evaluate uncertainty in key temperature  
162 values that define the transmission range, including critical thermal minimum, maximum, and  
163 optimum. Uncertainty was higher for the critical thermal minimum for transmission than for the  
164 maximum or optimum, and the two mosquito species overlapped most for this outcome (Fig. 2,  
165 bottom panels). This occurred because several trait thermal responses increase gradually from  
166 low to mid temperatures but decline more steeply at high temperatures (Fig. 1), so uncertainty is  
167 greatest at low temperatures. *Ae. aegypti* has a substantially higher optimum and maximum  
168 temperature than *Ae. albopictus* (Fig. 2) due to its greater rates of adult survival at high  
169 temperatures (see Supplementary Materials for sensitivity analyses).

170

### 171 Model validation

172 We used generalized linear models (GLM) to ask whether the predicted relationship  
173 between temperature and transmission,  $R_0(T)$ , was consistent with observed human cases of  
174 DENV, CHIKV, and ZIKV. Specifically, we assessed whether  $R_0(T)$  was an important predictor  
175 of the probability of autochthonous transmission occurring and of the incidence given that  
176 transmission occurred. We also controlled for human population size, virus species, and two  
177 socioeconomic factors. (Note that we focused on testing the  $R_0(T)$  model, rather than on  
178 constructing the best possible statistical model of human case data.) To do this, we used the  
179 version of the *Ae. aegypti*  $R_0(T)$  model that includes 8°C daily temperature range, along with  
180 country-scale weekly case reports of DENV, CHIKV, and ZIKV in the Americas and the  
181 Caribbean between 2014-2016. We first addressed the fact that countries with larger populations  
182 have greater opportunities for (large) epidemics by creating two predictors that incorporate  
183 scaled  $R_0(T)$  and population size. In the models of the probability of autochthonous transmission

184 occurring we used the product of the posterior probability that  $R_0(T) > 0$  (which we notate as  
185  $GR_0$ ) and the log of population size ( $p$ ) to give  $\log(p) * GR_0$ . In the models of incidence given that  
186 transmission does occur we used the log of the product of the posterior mean of  $R_0(T)$  and  
187 population size,  $\log(p * R_0(T))$ . To control for several socioeconomic factors that might obscure  
188 the impact of temperature, we also included log of gross domestic product (GDP) and log percent  
189 of GDP in tourism (using logs to improve normality). These are potential indicators of  
190 investment in and/or success of vector control and infrastructure improvements that prevent  
191 transmission. By comparing models that included the  $R_0(T)$  metric alone, socioeconomic factors  
192 alone, or both, we tested whether  $R_0(T)$  was an important predictor of observed transmission  
193 occurrence and incidence (see Table S4). Note that  $R_0(T)$  is out of sample because it is derived  
194 and calculated strictly from laboratory data on mosquitoes, and we perform a validation analyses  
195 for  $R_0(T)$  using independent case incidence reports. For this validation step we assessed model  
196 adequacy for the transmission data in two ways. First we used the full dataset for case incidence  
197 reports to select the best model (Table S4) and determine whether or not our predicted value of  
198 relative  $R_0(T)$  based on laboratory data was included in the model (“within sample” analysis).  
199 Second we used a bootstrapping approach where models were fit on subsets of the case incidence  
200 data that were randomly sampled and then predictive accuracy of the competing models (Table  
201 S4) was assessed on left-out data (“out of sample” analysis).

202 For the probability of autochthonous transmission occurring, the model that included both  
203 the  $R_0(T)$  predictor and socioeconomic predictors had overwhelming support based on Bayesian  
204 Information Criterion (BIC; model PA5 relative probability = 1, Table S4). Based on deviance  
205 explained, the models that included  $R_0(T)$ , with or without the socioeconomic predictors out-  
206 performed the model that did not include  $R_0(T)$  (Table S4; Figs. 3A, S2). In analyses of out-of-

207 sample accuracy, models that included the  $R_0(T)$  metric (with or without the socioeconomic  
208 factors) were surprisingly accurate. They predicted the probability of transmission with 86-91%  
209 out-of-sample accuracy for DENV (Table S4). For CHIKV and ZIKV, models that included the  
210  $R_0(T)$  metric or population alone had 66-69% out-of-sample accuracy (Table S4). There were no  
211 significant differences in out-of-sample accuracy between the top four models but for both  
212 DENV and CHIKV/ZIKV the best model was significantly better than the worst model (see  
213 Supplementary Code for full results). The lower out-of-sample accuracy for CHIKV and ZIKV  
214 likely reflects the much lower frequency of positive values and the lower total sample size of this  
215 dataset. All results were similar for a set of models that separated  $GR_0$  from population size, so  
216 for simplicity we show the model predictors that combines  $GR_0$  and population size here (see  
217 Table S4 and Supplementary Code for results of other models). Further, from a biological  
218 perspective, the combined model better describes what we know about disease systems: if either  
219 the probability of  $R_0(T)$  being greater than zero is small or population size is very small,  
220 transmission is unlikely to occur. Together, these analyses suggest that  $R_0(T)$  is an important  
221 predictor of transmission occurrence, but that CHIKV and ZIKV need further data to better  
222 explain the probability of transmission occurrence (Figs. 3A, S2).

223  
224 **Fig. 3.** *Ae. aegypti*  $R_0(T)$  and population size predict the probability and magnitude of  
225 transmission of DENV, CHIKV, and ZIKV across the Americas. A,  $\log(p)*GR_0$  (the posterior  
226 probability that  $R_0(T) > 0$  times the log of population size) versus the probability of local  
227 transmission in the data. B,  $\log(p*R_0(T))$  (log of  $R_0(T)$  times the population size) versus the log  
228 of incidence, given that it exceeds the threshold for local transmission. Tick-marks and points:  
229 human transmission occurrence and incidence data, respectively, by country-week in the

230 Americas and Caribbean. Lines and shaded areas: mean and 95% CI from GLM fits for DENV  
231 (blue) and CHIKV and ZIKV (red). For simplicity, we show the models that only include the  
232 covariates  $\log(p)*GR_0$  or  $\log(p)*R_0(T)$ , respectively, and do not include the socioeconomic  
233 covariates (models PA6 and IM4 in Table S4). For each case report data point,  $\log(p)*GR_0$  and  
234  $\log(p)*R_0(T)$  were calculated at the mean temperature 10 weeks prior to the reporting week [39].

235

236  $R_0(T)$  was also an important predictor of incidence, given that autochthonous  
237 transmission did occur. Within-sample, incidence was best predicted by the model that included  
238 both  $R_0(T)$  and the socioeconomic predictors (model IM5 in Table S4) based on BIC (relative  
239 probability = 1). The models that included  $R_0(T)$  out-performed those that did not based on  
240 deviance explained (Table S4). In out-of-sample validation, the models that included  $R_0(T)$   
241 explained the magnitude of incidence based on mean absolute percentage error (85-86%  
242 accuracy versus 83% accuracy for models that did not include  $R_0(T)$ ; Table S4), but this  
243 difference was not statistically significant. For illustration, we show the simpler model that only  
244 contains the  $R_0(T)$  predictor in the main text (Fig. 3B; model IM1 in Table S4). Notably, the  
245 models that contained  $R_0(T)$  predicted incidence well for all three viruses, despite the lower  
246 incidence of CHIKV and ZIKV.

247 Although predicted  $R_0(T)$  correlated with the observed occurrence and magnitude of  
248 human incidence for all three viruses, these observed incidence metrics were higher for DENV  
249 than for CHIKV and ZIKV. While the reason for this difference is unclear, the most likely  
250 explanation is that DENV is much more established in the region, so it is more likely to be  
251 detected, diagnosed, and reported. Because ZIKV and CHIKV are newly emerging, they may not  
252 have fully saturated the region at this early stage.

253           The ability of the model to explain the probability and magnitude of transmission is  
254 notable given the coarse scale of the human incidence versus mean temperature data (i.e.,  
255 country-scale means), the lack of CHIKV- and ZIKV-specific trait thermal response data to  
256 inform the model, the nonlinear relationship between transmission and incidence, and all the  
257 well-documented factors other than temperature that influence transmission. Together, these  
258 analyses show simple mechanistic models parameterized with laboratory data on mosquitoes and  
259 dengue virus are consistent with observed temperature suitability for transmission. Moreover, the  
260 similar responses of human incidence of ZIKV, CHIKV, and DENV to temperature suggest that  
261 the thermal ecology of their shared mosquito vectors is a key determinant of outbreak location,  
262 timing, and intensity.

263

#### 264 Mapping climate suitability for transmission

265           The validated model can be used to predict where transmission is not excluded (posterior  
266 probability that  $R_0(T) > 0$ , a conservative estimate of transmission risk). Considering the number  
267 of months per year at which mean temperatures do not prevent transmission, large areas of  
268 tropical and subtropical regions, including Puerto Rico and parts of Florida and Texas, are  
269 currently suitable year-round or seasonally (Fig. 4). These regions are fundamentally at risk for  
270 DENV, CHIKV, ZIKV, and other *Aedes* arbovirus transmission during a substantial part of the  
271 year (Fig. 4). Indeed, DENV, CHIKV, and/or ZIKV local transmission has occurred in Texas,  
272 Florida, Hawaii, and Puerto Rico ([www.cdc.gov](http://www.cdc.gov)). On the other hand, many temperate regions  
273 experience temperatures suitable for transmission three months or less per year (Fig. 4), and the  
274 virus incubation periods in humans and mosquitoes restrict the transmission window even  
275 further. Temperature thus limits the potential for the viruses to generate extensive epidemics in

276 temperate areas even where the vectors are present. Moreover, many temperate regions with  
277 seasonally suitable temperatures currently lack *Ae. aegypti* and *Ae. albopictus* mosquitoes,  
278 making vector transmission impossible (Fig. 4, black line). The posterior distribution of  $R_0(T)$   
279 also allows us to map months of risk with different degrees of uncertainty (e.g., 97.5%, 50%, and  
280 2.5% posterior probability that that  $R_0 > 0$ ), ranging from the most to least conservative (Fig.  
281 S4).

282

283 **Fig. 4.** Map of predicted temperature suitability for virus transmission by *Ae. albopictus* and *Ae.*  
284 *aegypti*. Color indicates the consecutive months in which temperature is permissive for  
285 transmission (predicted  $R_0 > 0$ ) for *Aedes* spp. transmission based on the minimum likely range  
286 ( $> 97.5\%$  posterior probability that  $R_0 > 0$ ). Black lines indicate the CDC estimated range for the  
287 two *Aedes* spp. in the United States. Model suitability predictions combine temperature mean  
288 and  $8^\circ\text{C}$  daily variation and are informed by laboratory data (Figs. 1, S1) and validated against  
289 field data (Fig. 3).

290

## 291 Discussion

292 Temperature is an important driver of—and limitation on—vector transmission, so  
293 accurately describing the temperature range and optimum for transmission of DENV, CHIKV,  
294 and ZIKV is critical for predicting their geographic and seasonal patterns of spread [12,40]. We  
295 directly estimated the temperature – transmission relationship using mechanistic transmission  
296 models for each mosquito species (Fig. 2). These models are built using empirical estimates of  
297 the (unimodal) effects of temperature on mosquito and pathogen traits that drive transmission,  
298 including survival, development, reproduction, and biting rates (Figs. 1, S1). Because these trait

299 thermal responses are unimodal across the majority of ectotherm taxa and traits, and because the  
300 traits combine nonlinearly to drive transmission, the emergent relationship between temperature  
301 and transmission is difficult to infer directly from field data or from individual trait responses.  
302 Here, we present a model of temperature-dependent DENV, CHIKV, and ZIKV transmission  
303 that advances on previous models because it is mechanistic, fitted from experimental trait data,  
304 and validated against independent human case data at a broad geographic scale (Fig. 3).

305         Mechanistic understanding is valuable for extrapolating beyond the current spatial and  
306 temporal range of transmission (Fig. 4), as compared to environmental niche models, for  
307 example [5,41,42]. Of the six previous mechanistic temperature-dependent models of DENV,  
308 CHIKV, or ZIKV transmission by *Ae. aegypti* and *Ae. albopictus* that we were able to reproduce,  
309 three had similar thermal optima [7,43,44] while the other three had dramatically higher optima  
310 (3-6°C) [9,45] (Fig. S5). Two models predicted much greater suitability for transmission at low  
311 temperatures [45], four predicted greater suitability at high temperatures [7,9,45], and two were  
312 very similar to ours [43,44] (Fig. S5). Only one of these previous models was (like ours)  
313 statistically validated against independent data not used to estimate model parameters, and its  
314 predictions were very similar to those of our model [43]. Other mechanistic and environmental  
315 niche models could not be directly compared with ours [5,10,40–42], either because fully  
316 reproducible equations, parameters, and/or code were not provided or because their predicted  
317 marginal effects of temperature were not displayed. Visually, our maps are similar to maps based  
318 on a previous model of *Ae. aegypti* and *Ae. albopictus* persistence suitability indices [40]. Recent  
319 environmental niche models of Zika distribution have shown similar but more constrained  
320 predicted distributions of environmental suitability, in part because these models include not just

321 temperature suitability but also further environmental, socioeconomic, and demographic  
322 constraints [5,41,42,46].

323         Even though the thermal response data are imperfect—for example, CHIKV and ZIKV  
324 thermal response data are missing—and the human case data are reported at a coarse spatial  
325 scale, the validation analyses suggest that  $R_0(T)$  is an important predictor of both the probability  
326 of transmission occurring and the magnitude of incidence for DENV, CHIKV, and ZIKV. This  
327 has several key implications. First, temperature-dependent transmission is pervasive enough to  
328 be detected at a coarse spatial scale. Second, dynamics of the mosquito predict transmission for a  
329 suite of *Ae. aegypti*-transmitted viruses, without additional virus-specific information. Third,  
330 climate and socio-economic factors combine to shape variation in incidence across countries.  
331 Finally, these simple predictors explain a substantial proportion of the variance in both the  
332 probability and intensity of transmission.

333         Predicting arbovirus transmission at a higher spatial resolution and precision will require  
334 more detailed information on factors like the exposure and susceptibility of human populations,  
335 environmental variation (e.g., oviposition habitat availability, seasonal and daily temperature  
336 variation), and socioeconomic factors. However, as a first step our mechanistic model provides  
337 valuable insight because it makes broad predictions about suitable environmental conditions for  
338 transmission, it is mechanistic and grounded in experimental trait data, it is validated against  
339 independent human case data, and its predictions are applicable across three different viruses.  
340 Using these thermal response models as a scaffold, additional drivers could be incorporated to  
341 obtain more precise and specific predictions about transmission dynamics, which could in turn be  
342 used for public health and vector control applications. For this purpose, all code and data used in  
343 the models are available as Supplementary Files.



344 The socio-ecological conditions that enabled CHIKV, ZIKV, and DENV to become the  
345 three most important emerging vector-borne diseases in the Americas make the emergence of  
346 additional *Aedes*-transmitted viruses likely (potentially including Mayaro, Rift Valley fever,  
347 yellow fever, Uganda S, or Ross River viruses). Efforts to extrapolate and to map temperature  
348 suitability (Fig. 4) will be critical for improving management of both ongoing and future  
349 emerging epidemics. Mechanistic models like the one presented here are useful for extrapolating  
350 the potential geographic range of transmission beyond the current envelope of environmental  
351 conditions in which transmission occurs (e.g., under climate change and for newly invading  
352 pathogens). Accurately estimating temperature-driven transmission risk in both highly suitable  
353 and marginal regions is critical for predicting and responding to future outbreaks of these and  
354 other *Aedes*-transmitted viruses.

## 355 **Materials and Methods**

### 356 Temperature-sensitive $R_0$ models

357 We constructed temperature-dependent models of transmission using a previously  
358 developed  $R_0$  framework. We modeled transmission rate as the basic reproduction rate,  $R_0$ —the  
359 number of secondary infections that would originate from a single infected individual introduced  
360 to a fully susceptible population. In previous work on malaria, we adapted a commonly used  
361 expression for  $R_0$  for vector transmission to include the temperature-sensitive traits that drive  
362 mosquito population density :

$$363 \quad R_0(T) = \left( \frac{a(T)^2 b(T) c(T) e^{-\mu(T)/PDR(T)} EFD(T) p_{EA}(T) MDR(T)}{N r \mu(T)^3} \right)^{1/2} \quad (1)$$

364 Here,  $(T)$  indicates that the trait is a function of temperature,  $T$ ;  $a$  is the per-mosquito biting rate,  
365  $b$  is the proportion of infectious bites that infect susceptible humans,  $c$  is the proportion of bites

366 on infected humans that infect previously uninfected mosquitoes (i.e.,  $b*c$  = vector competence),  
367  $\mu$  is the adult mosquito mortality rate (lifespan,  $lf = 1/\mu$ ),  $PDR$  is the parasite development rate  
368 (i.e., the inverse of the extrinsic incubation period, the time required between a mosquito biting  
369 an infected host and becoming infectious),  $EFD$  is the number of eggs produced per female  
370 mosquito per day,  $p_{EA}$  is the mosquito egg-to-adult survival probability,  $MDR$  is the mosquito  
371 immature development rate (i.e., the inverse of the egg-to-adult development time),  $N$  is the  
372 density of humans, and  $r$  is the human recovery rate. For each temperature-sensitive trait in each  
373 mosquito species, we fit either symmetric (Quadratic,  $-c(T - T_0)(T - T_m)$ ) or asymmetric (Brière,  
374  $cT(T - T_0)(T_m - T)^{1/2}$ ) unimodal thermal response models to the available empirical data [47]. In  
375 both functions,  $T_0$  and  $T_m$  are respectively the minimum and maximum temperature for  
376 transmission, and  $c$  is a positive rate constant.

377 We consider a normalized version of the  $R_0$  equation such that it is rescaled to range from  
378 zero to one with the value of one occurring at the unimodal peak. Although absolute values of  $R_0$   
379 that are used to determine when transmission is stable depend on additional factors not captured  
380 in our model, the minimum and maximum temperatures for which  $R_0 > 0$  map exactly onto our  
381 normalized equations, allowing us to accurately calculate whether or not transmission should be  
382 possible at all. Empirical estimates of absolute values of  $R_0$  are difficult to obtain in any case, but  
383 it is much easier to determine whether transmission is occurring and for how long. While  
384 different model formulations for predicting  $R_0$  versus temperature can produce results with  
385 different magnitudes and potentially different overall shapes [48], the temperatures for which  $R_0$   
386 is above or below zero (or one) are mostly model independent. For instance, two competing  
387 models differ only by whether or not the formula in equation (1) is squared, but the square of a  
388 number (e.g., an absolute  $R_0$  value) greater than one is always greater than one, and the square of

389 a number less than one is always less than one. Therefore, the threshold temperatures at which  
390 absolute  $R_0 > 0$  or absolute  $R_0 > 1$  will be exactly the same for either choice of formula (Fig. S6).  
391 Similarly, because different expressions for  $R_0$ , including the square of equation (1), map  
392 monotonically onto our function, they will produce identical estimates for the temperatures at  
393 which transmission declines to zero and peaks (Fig. S6). Consequently, our use of relative  $R_0$   
394 adequately describes the nonlinear relationship between mosquito and virus traits and  
395 transmission.

396 We fit the trait thermal responses in equation (1) based on an exhaustive search of  
397 published laboratory studies that fulfilled the criterion of measuring a trait at three or more  
398 constant temperatures, ideally capturing both the rise and the fall of each unimodal curve (Tables  
399 S1-S2). Constant-temperature laboratory conditions are required to isolate the direct effect of  
400 temperature from confounding factors in the field and to provide a baseline for estimating the  
401 effects of temperature variation through rate summation [49]. We attempted to obtain raw data  
402 from each study, but if they were not available we collected data by hand from tables or digitized  
403 data from figures using WebPlotDigitizer [50]. We obtained raw data from Delatte [19] and Alto  
404 [21] for the *Ae. albopictus* egg-to-adult survival probability ( $pEA$ ), mosquito development rate  
405 (MDR), gonotrophic cycle duration (GCD, which we assumed was equal to the inverse of the  
406 biting rate) and total fecundity (TFD) (Table S2). Data did not meet the inclusion criterion for  
407 CHIKV or ZIKV vector competence ( $b$ ,  $c$ ) or extrinsic incubation period ( $EIP$ ) in either *Ae.*  
408 *albopictus* or *Ae. aegypti*. Instead, we used DENV EIP and vector competence data, combined  
409 with sensitivity analyses.

410 Following Johnson *et al.* [51], we fit a thermal response for each trait using Bayesian  
411 models. We first fit Bayesian models for each trait thermal response using uninformative priors

412 ( $T_0 \sim \text{Uniform}(0, 24)$ ,  $T_m \sim \text{Uniform}(25, 45)$ ,  $c \sim \text{Gamma}(1, 10)$  for Brière and  $c \sim \text{Gamma}(1,$   
413  $1)$  for Quadratic fits) chosen to restrict each parameter to its biologically realistic range (i.e.,  $T_0 <$   
414  $T_m$  and we assumed that temperatures below  $0^\circ\text{C}$  and above  $45^\circ\text{C}$  were lethal). Any negative  
415 values for all thermal response functions were truncated at zero, and thermal responses for  
416 probabilities ( $p_{EA}$ ,  $b$ , and  $c$ ) were also truncated at one. We modeled the observed data as arising  
417 from a normal distribution with the mean predicted by the thermal response function calculated  
418 at the observed temperature, and the precision  $\tau$ , ( $\tau = 1/\sigma$ ), distributed as  $\tau \sim \text{Gamma}(0.0001,$   
419  $00001)$ . We fit the models using Markov Chain Monte Carlo (MCMC) sampling in JAGS, using  
420 the R [52] package *rjags* [53]. For each thermal response, we ran five MCMC chains with a  
421 5000-step burn-in and saved the subsequent 5000 steps. We thinned the posterior samples by  
422 saving every fifth sample and used the samples to calculate  $R_0$  from 15-40°C, producing a  
423 posterior distribution of  $R_0$  versus temperature. We summarized the relationship between  
424 temperature and each trait or overall  $R_0$  by calculating the mean and 95% highest posterior  
425 density interval (HPD interval; a type of credible interval that includes the smallest continuous  
426 range containing 95% of the probability, as implemented in the *coda* package [54]) for each  
427 curve across temperatures.

428 We fit a second set of models for each mosquito species that used informative priors to  
429 reduce uncertainty in  $R_0$  versus temperature and in the trait thermal responses. In these models,  
430 we used Gamma-distributed priors for each parameter  $T_0$ ,  $T_m$ ,  $c$ , and  $\tau$  fit from an additional  
431 ‘prior’ dataset of *Aedes* spp. trait data that did not meet the inclusion criteria for the primary  
432 dataset (Table S3). We found that these initial informative priors could have an overly strong  
433 influence on the posteriors, in some cases drawing the posterior distributions well away from the  
434 primary dataset, which was better controlled and met the inclusion criteria. We accounted for our

435 lower confidence in this data set by increasing the variance in the informative priors, by  
436 multiplying all hyperparameters (i.e., the parameters of the Gamma distributions of priors for  $T_0$ ,  
437  $T_m$ , and  $c$ ) by a constant  $k$  to produce a distribution with the same mean but  $1/k$  times larger  
438 variance. We chose the value of  $k$  based on our relative confidence in the prior versus main data.  
439 Thus we chose  $k = 0.5$  for  $b$ ,  $c$ , and  $PDR$  and  $k = 0.01$  for  $lf$ . This is the main model presented in  
440 the text (Fig. 2). It is comparable to some but not all previous mechanistic models for *Ae. aegypti*  
441 and *Ae. albopictus* transmission (Fig. S5). Results of our main model, fit with informative priors,  
442 did not vary substantially from the model fit with uninformative priors (Figs. S7-S8).

#### 443 Incorporating daily temperature variation in transmission models

444 Because organisms do not typically experience constant temperature environments in  
445 nature, we incorporated the effects of temperature variation on transmission by calculating a  
446 daily average  $R_0$  assuming a daily temperature range of  $8^\circ\text{C}$ , across a range of mean  
447 temperatures. This range is consistent with daily temperature variation in tropical and subtropical  
448 environments but lower than in most temperate environments. At each mean temperature, we  
449 used a Parton-Logan model to generate hourly temperatures and calculate each temperature-  
450 sensitive trait on an hourly basis [55]. We assumed an irreversible high-temperature threshold  
451 above which mosquitoes die and transmission is impossible [56,57]. We set this threshold based  
452 on hourly temperatures exceeding the critical thermal maximum ( $T_m$  in Tables S1-S2) for egg-to-  
453 adult survival or adult longevity by any amount for five hours or by  $3^\circ\text{C}$  for one hour. We  
454 averaged each trait over 24 hours to obtain a daily average trait value, which we used to calculate  
455 relative  $R_0$  across a range of mean temperatures. We used this model in the validation against  
456 human cases (Fig. 3) and the risk map (Fig. 4).

#### 457 Model validation with DENV, CHIKV, and ZIKV incidence data

458 To validate the model, we used data on human cases of DENV, CHIKV, and ZIKV at the  
459 country scale and mean temperature during the transmission window. Using statistical models  
460 (as described below), we estimated the effects of predicted  $R_0(T)$  on the probability of local  
461 transmission and the magnitude of incidence, controlling for population size and several  
462 socioeconomic factors. We downloaded and manually entered Pan American Health  
463 Organization (PAHO) weekly case reports for DENV and CHIKV for all countries in the  
464 Americas (North, Central, and South America and the Caribbean Islands) from week 1 of 2014  
465 to week 8 of 2015 for CHIKV and from week 52 of 2013 to week 47 of 2015 for DENV  
466 ([www.paho.org](http://www.paho.org)). ZIKV weekly case reports for reporting districts (e.g., provinces) within  
467 Colombia, Mexico, El Salvador, and the US Virgin Islands were available from the CDC  
468 Epidemic Prediction Initiative (<https://github.com/cdcepi/>) from November 28, 2015 to April 2,  
469 2016. We aggregated the ZIKV data into country-level weekly case reports to match the spatial  
470 resolution of the DENV, CHIKV, and covariate data.

471

#### 472 Temperature data collection

473 We matched the DENV, CHIKV, and ZIKV incidence data with temperature using daily  
474 temperature data from METAR stations in each country, averaged at the country level by  
475 epidemic week. A previous study found a six-week lagged relationship between temperature and  
476 oviposition for *Aedes aegypti* in Ecuador [39]. Assuming that the subsequent transmission,  
477 disease development, medical care-seeking, and case reporting in humans takes an additional  
478 four weeks, we assumed *a priori* a ten-week lag between temperature and incidence (i.e., mean  
479 temperature for the week that is ten weeks prior to each case report). METAR stations are  
480 internationally standardized weather reporting stations that report hourly temperature and

481 precipitation measures. Outlier weather stations were excluded if they reported a daily maximum  
482 temperature below 5°C or a daily minimum temperature above 40°C during the study period,  
483 extremes that would certainly eliminate the potential for transmission in a local area. Because  
484 case data are reported at the country level, we needed a collection of weather stations in each  
485 country that accurately represent weather conditions in the areas where transmission occurs,  
486 excluding extreme areas where transmission is unlikely. For the study period of October 1, 2013  
487 through April 30, 2016, we downloaded daily temperature data for each station from Weather  
488 Underground using the *weatherData* package in R [58]. We removed all data from Chile because  
489 it spans so much latitude and the terrain is so diverse that its country-level mean is unlikely to be  
490 very representative of the temperature where an outbreak occurred.

#### 491 Socioeconomic covariate data

492 We accessed available data on projected 2016 gross domestic product (GDP) for  
493 countries of interest via the International Monetary Fund's World Economic Outlook Database  
494 (<http://www.imf.org/external/ns/cs.aspx?id=28>). The direct and total contributions of tourism to  
495 GDP in 2016 were compiled from World Travel and Tourism Council economic impact reports  
496 ([http://www.wttc.org/research/economic-research/economic-impact-analysis/country-](http://www.wttc.org/research/economic-research/economic-impact-analysis/country-reports/#undefined)  
497 [reports/#undefined](http://www.wttc.org/research/economic-research/economic-impact-analysis/country-reports/#undefined)). We retrieved population size data for 2013-2015 from the United Nations  
498 Population Division (<https://esa.un.org/unpd/wpp/Download/Standard/Population/>) and averaged  
499 them across the three years for each country. Throughout the analyses below, unless otherwise  
500 specified, we used the natural log of the population size and of GDP as our predictors. We have  
501 two reasons for this choice. The first is that, intuitively, the relative order of magnitude of the  
502 population/GDP is more important in determining observed outbreak sizes or probabilities than  
503 their absolute sizes. Second, population sizes and GDPs across countries tend to exhibit clumped

504 patterns with a few outliers that are much larger than the others. From a statistical perspective,  
505 using the un-transformed populations (or GDPs) results in those few large/rich countries having  
506 very high leverage in the analysis, and thus potentially skewing the results. Taking a log of the  
507 population better balances these predictors and is the standard accepted approach when using  
508 these kinds of predictors in regression models.

#### 509 Validation analyses with human incidence versus temperature datasets

510 To validate the  $R_0(T)$  model while controlling for population and socio-economic factors,  
511 we used generalized linear regression on the weekly case count data. Importantly, we focused on  
512 testing whether the case counts were consistent with the transmission – temperature relationship  
513 predicted from our model, rather than on maximizing the variation explained in the statistical  
514 model. We are more specifically interested in understanding autochthonous transmission (i.e.,  
515 locally acquired, not just imported cases). We set country-level thresholds for the number of  
516 cases defining autochthonous transmission for our three diseases separately, based on current  
517 transmission understanding: seven cases of CHIKV, 70 cases of DENV, and three cases of  
518 ZIKV. We derived these thresholds in the following way. First, we looked for data on outbreaks  
519 of travel related cases in countries that are not expected to experience any local transmission. For  
520 instance, in 2014 Canada experienced 320 confirmed, travel-related cases of chikungunya  
521 (<http://www.phac-aspc.gc.ca/publicat/ccdr-rmtc/15vol41/dr-rm41-01/rapid-eng.php>), equivalent  
522 to an average of more than six cases per week. Thus, to be conservative in our estimates, we set  
523 the threshold of transmission as seven cases/week for CHIKV. The reported weekly cases of  
524 DENV transmission in our study sample are considerably higher than for CHIKV (mean DENV  
525 incidence was nearly 100 times higher mean CHIKV incidence). We chose a moderately high  
526 threshold of 70 cases in a week (i.e., 10 times higher than the CHIKV threshold based on



527 Canadian cases) to reflect higher overall incidence and increased potential for travel related  
528 cases. We examined the sensitivity of the results to choice of threshold by varying it from 25 to  
529 100, and we found qualitatively similar results for all thresholds that we tested. As ZIKV is not  
530 as well established as either CHIKV or DENV at this time, smaller numbers of cases may  
531 indicate autochthonous transmission. Consequently, we chose a threshold of three cases for  
532 ZIKV (approximately half the CHIKV threshold). Further, the results were fairly sensitive to the  
533 ZIKV threshold as many locations have small numbers of cases. Since higher thresholds exclude  
534 a very large proportion of available case data making analysis impossible, we used the slightly  
535 less conservative threshold of three cases for autochthonous transmission of ZIKV. The resulting  
536 data consisted of zeros for no transmission and positive case counts when transmission is  
537 presumed to be occurring. To model these data, we used a hurdle model that first uses logistic  
538 regression on the presence/absence of local transmission data to understand the factors correlated  
539 with local transmission occurring or not (PA analysis). Then we modeled the log of incidence  
540 (number of new cases per reporting week) for positive values with a gamma generalized linear  
541 models (GLM; i.e., incidence analysis).

542 We were interested in understanding whether  $R_0(T)$  was an important predictor of human  
543 transmission occurrence and incidence, after controlling for potentially confounding factors like  
544 population size and socioeconomic conditions. To do this, we fit a series of models with different  
545 subsets of predictors that included  $R_0(T)$ , the socioeconomic variables with population, or both  
546 (see Table S4 for full models). To control for human population size, we created new metrics  
547 based on  $R_0(T)$  and population size to use for validation against the PAHO incidence data. We  
548 define  $GR_0$ , which is the posterior probability that  $R_0(T) > 0$ . We use  $\log(p) * GR_0$ , where  $p$  is the  
549 population size, as the relevant  $R_0$ -based predictor for the PA analysis. For the incidence

550 analysis, we instead use  $\log(p \cdot R_0(T))$  as the predictor. In all cases log refers to the natural  
551 logarithm. For simplicity, we refer to these as the  $R_0(T)$  metrics hereafter and in the Results.

552 In both the PA and incidence analyses, we first used the full data sets to examine which  
553 of the candidate models best described the data. Randomized quantile residuals indicated that the  
554 logistic and gamma GLM models were performing adequately. We compared the approximate  
555 model probabilities, calculated from the BIC scores, as well as the proportion of deviance  
556 explained ( $D^2$ ) from each model. Next we examined the performance of the models in predicting  
557 out of sample, for both PA and incidence analyses. To do this we created 1000 random  
558 partitions, where 90% of the data were used to train the model and 10% were used for testing. In  
559 the PA analyses we classified each partition based on presence/absence, with separate  
560 classification thresholds for DENV versus CHIKV/ZIKV as these grouping had much different  
561 probabilities of occurrence. We assessed the performance of the model for the PA analysis based  
562 on the mean misclassification rate. In the incidence analyses we assessed the model performance  
563 based on the predictive mean absolute percentage error (MAPE). Since differences in prediction  
564 success between the models in both the PA and incidence analyses were not statistically  
565 significant, we present the simpler models that only include the  $R_0(T)$  metrics in the main text  
566 (Fig. 3) and the models that additionally include socioeconomic covariates in the Supplementary  
567 Information (Figs. S2-S3). We plotted the model predictions as a function of the  $R_0(T)$  metrics  
568 together with the observed data for the PA and incidence analyses using the R package *visreg*  
569 [59].

570 The residuals of the incidence model exhibit “inverse trumpeting,” in which residual  
571 variation is larger at low than high predicted incidence (Fig. S9). This occurs in part because we  
572 forced the model to go through the origin, i.e., no transmission when  $R_0(T)$  or the population size

573 is equal to zero. However, the data did sometimes show transmission where we did not expect it,  
574 potentially because of imported cases, errors in reporting, or small pockets of transmission  
575 suitability in countries or times that are otherwise unsuitable on average. More local-scale case  
576 reporting that separates autochthonous from travel-associated cases would be needed to tease  
577 apart the source of this error.

578

### 579 Mapping temperature suitability for transmission

580 Using our validated model, we were interested in where the temperature was suitable for  
581 *Ae. aegypti* and/or *Ae. albopictus* transmission for some or all of the year to predict the potential  
582 geographic range of outbreaks in the Americas. We visualized the minimum, median, and  
583 maximum extent of transmission based on probability of occurrence thresholds from the  $R_0$   
584 models for both mosquitoes. We calculated the number of consecutive months in which the  
585 posterior probability of  $R_0 > 0$  exceeds a threshold of 0.025, 0.5, or 0.975 for both mosquito  
586 species, representing the maximum, median, and minimum likely ranges, respectively. The  
587 minimum range is shown in Fig. 4 and all three ranges are overlaid in Fig. S4. This analysis  
588 indicates the predicted seasonality of temperature suitability for transmission geographically, but  
589 does not indicate its magnitude. To generate the maps, we cropped monthly mean temperature  
590 rasters from 1950-2000 for all twelve months (Worldclim; [www.worldclim.org/](http://www.worldclim.org/)) to the Americas  
591 (*R*, *raster* package, *crop* function) and assigned cells values of one or zero depending on whether  
592 the probability that  $R_0 > 0$  exceeded the threshold at the temperatures in those cells. We then  
593 synthesized the monthly grids into a single raster that reflected the maximum number of  
594 consecutive months where cell values equaled one. The resulting rasters were plotted in ArcGIS  
595 10.3, overlaying the three cutoffs (Fig. S4). We repeated this process for both mosquito species.

596

597

598 **Acknowledgments**

599 Barry Alto, Krijn Paaijmans, Francis Ezeakacha, and Helene Delatte kindly provided raw data  
600 used in the analyses. We gratefully acknowledge the Centers for Disease Control and Prevention  
601 Epidemic Predictions Initiative (CDC EPI) for collating and sharing the Zika incidence data on  
602 GitHub (<https://zenodo.org/record/48946#.Vz-EM2bb8ys>).

603

604 **Supporting Information Legends**

605 **S1 Appendix. Supplementary Results, References, Figures S1-S15, and Tables S1-S3.**

606 **S2 Appendix. Table S4.** Model validation results.

607 **S3 Appendix. Online code, data, and analyses.** Available as a ZIP file on Figshare:

608 <https://figshare.com/s/b79bc7537201e7b5603f>, DOI:

609 <https://dx.doi.org/10.6084/m9.figshare.4563928>.

610

611 **References:**

- 612 1. Brady OJ, Gething PW, Bhatt S, Messina JP, Brownstein JS, Hoen AG, et al. Refining the global spatial limits  
613 of dengue virus transmission by evidence-based consensus. *PLOS Negl Trop Dis*. 2012;6: e1760.  
614 doi:10.1371/journal.pntd.0001760
- 615 2. Bhatt S, Gething PW, Brady OJ, Messina JP, Farlow AW, Moyes CL, et al. The global distribution and burden  
616 of dengue. *Nature*. 2013;496: 504–507. doi:10.1038/nature12060
- 617 3. Rasmussen SA, Jamieson DJ, Honein MA, Petersen LR. Zika virus and birth defects — reviewing the evidence  
618 for causality. *N Engl J Med*. 2016;374: 1981–1987. doi:10.1056/NEJMs1604338
- 619 4. Scott TW, Takken W. Feeding strategies of anthropophilic mosquitoes result in increased risk of pathogen  
620 transmission. *Trends Parasitol*. 2012;28: 114–121. doi:10.1016/j.pt.2012.01.001
- 621 5. Messina JP, Kraemer MU, Brady OJ, Pigott DM, Shearer FM, Weiss DJ, et al. Mapping global environmental  
622 suitability for Zika virus. *eLife*. 2016;5: e15272. doi:10.7554/eLife.15272
- 623 6. Magori K, Legros M, Puente ME, Focks DA, Scott TW, Lloyd AL, et al. Skeeter Buster: A stochastic, spatially  
624 explicit modeling tool for studying *Aedes aegypti* population replacement and population suppression  
625 strategies. *PLOS Negl Trop Dis*. 2009;3: e508. doi:10.1371/journal.pntd.0000508
- 626 7. Johansson MA, Powers AM, Pesik N, Cohen NJ, Staples JE. Nowcasting the spread of chikungunya virus in the  
627 Americas. *PLoS ONE*. 2014;9: e104915. doi:10.1371/journal.pone.0104915
- 628 8. Perkins TA, Metcalf CJE, Grenfell BT, Tatem AJ. Estimating drivers of autochthonous transmission of  
629 chikungunya virus in its invasion of the Americas. *PLoS Curr*. 2015;7.  
630 doi:10.1371/currents.outbreaks.a4c7b6ac10e0420b1788c9767946d1fc
- 631 9. Morin CW, Monaghan AJ, Hayden MH, Barrera R, Ernst K. Meteorologically driven simulations of dengue  
632 epidemics in San Juan, PR. *PLoS Negl Trop Dis*. 2015;9: e0004002. doi:10.1371/journal.pntd.0004002
- 633 10. Zhang Q, Sun K, Chinazzi M, Pastore-Piontti A, Dean NE, Rojas DP, et al. Projected spread of Zika virus in  
634 the Americas. *bioRxiv*. 2016; 066456. doi:10.1101/066456
- 635 11. Dell AI, Pawar S, Savage VM. Systematic variation in the temperature dependence of physiological and  
636 ecological traits. *Proc Natl Acad Sci*. 2011;108: 10591–10596.
- 637 12. Mordecai EA, Paaijmans KP, Johnson LR, Balzer CH, Ben-Horin T, de Moor E, et al. Optimal temperature for  
638 malaria transmission is dramatically lower than previously predicted. *Ecol Lett*. 2013;16: 22–30.
- 639 13. Focks DA, Haile DG, Daniels E, Mount GA. Dynamic life table model for *Aedes aegypti* (Diptera: Culicidae):  
640 analysis of the literature and model development. *J Med Entomol*. 1993;30: 1003–1017.
- 641 14. Yang HM, Macoris MLG, Galvani KC, Andrighetti MTM, Wanderley DMV. Assessing the effects of  
642 temperature on the population of *Aedes aegypti*, the vector of dengue. *Epidemiol Infect*. 2009;137: 1188–  
643 1202. doi:10.1017/S0950268809002040
- 644 15. Rueda L, Patel K, Axtell R, Stinner R. Temperature-dependent development and survival rates of *Culex*  
645 *quinquefasciatus* and *Aedes aegypti* (Diptera: Culicidae). *J Med Entomol*. 1990;27: 892–898.
- 646 16. Tun-Lin W, Burkot TR, Kay BH. Effects of temperature and larval diet on development rates and survival of  
647 the dengue vector *Aedes aegypti* in north Queensland, Australia. *Med Vet Entomol*. 2000;14: 31–37.  
648 doi:10.1046/j.1365-2915.2000.00207.x

- 649 17. Kamimura K, Matsuse IT, Takahashi H, Komukai J, Fukuda T, Suzuki K, et al. Effect of temperature on the  
650 development of *Aedes aegypti* and *Aedes albopictus*. *Med Entomol Zool*. 2002;53: 53–58.
- 651 18. Eisen L, Monaghan AJ, Lozano-Fuentes S, Steinhoff DF, Hayden MH, Bieringer PE. The impact of  
652 temperature on the bionomics of *Aedes (Stegomyia) aegypti*, with special reference to the cool geographic  
653 range margins. *J Med Entomol*. 2014;51: 496–516. doi:10.1603/ME13214
- 654 19. Delatte H, Gimonneau G, Triboire A, Fontenille D. Influence of temperature on immature development,  
655 survival, longevity, fecundity, and gonotrophic cycles of *Aedes albopictus*, vector of chikungunya and dengue  
656 in the Indian Ocean. *J Med Entomol*. 2009;46: 33–41. doi:10.1603/033.046.0105
- 657 20. Muturi EJ, Lampman R, Costanzo K, Alto BW. Effect of temperature and insecticide stress on life-history traits  
658 of *Culex restuans* and *Aedes albopictus* (Diptera: Culicidae). *J Med Entomol*. 2011;48: 243–250.
- 659 21. Alto BW, Juliano SA. Temperature effects on the dynamics of *Aedes albopictus* (Diptera: Culicidae)  
660 populations in the laboratory. *J Med Entomol*. 2001;38: 548–556.
- 661 22. Westbrook CJ, Reiskind MH, Pesko KN, Greene KE, Lounibos LP. Larval environmental temperature and the  
662 susceptibility of *Aedes albopictus* Skuse (Diptera: Culicidae) to chikungunya virus. *Vector-Borne Zoonotic*  
663 *Dis*. 2010;10: 241–247. doi:10.1089/vbz.2009.0035
- 664 23. Briegel H, Timmermann SE. *Aedes albopictus* (Diptera: Culicidae): Physiological aspects of development and  
665 reproduction. *J Med Entomol*. 2001;38: 566–571. doi:10.1603/0022-2585-38.4.566
- 666 24. Calado DC, Navarro-Silva MA. Influência da temperatura sobre a longevidade, fecundidade e atividade  
667 hematofágica de *Aedes (Stegomyia) albopictus* Skuse, 1894 (Diptera, Culicidae) sob condições de laboratório.  
668 *Rev Bras Entomol*. 2002;46: 93–98. doi:10.1590/S0085-56262002000100011
- 669 25. Beserra EB, Fernandes CRM, Silva SA de O, Silva LA da, Santos JW dos. Efeitos da temperatura no ciclo de  
670 vida, exigências térmicas e estimativas do número de gerações anuais de *Aedes aegypti* (Diptera, Culicidae).  
671 *Iheringia Sér Zool*. 2009; Available: <http://agris.fao.org/agris-search/search.do?recordID=XS2010500501>
- 672 26. Westbrook CJ. Larval ecology and adult vector competence of invasive mosquitoes *Aedes albopictus* and  
673 *Aedes aegypti* for Chikungunya virus [Internet]. University of Florida. 2010. Available:  
674 [http://etd.fcla.edu/UF/UFE0041830/westbrook\\_c.pdf](http://etd.fcla.edu/UF/UFE0041830/westbrook_c.pdf)
- 675 27. Couret J, Dotson E, Benedict MQ. Temperature, Larval Diet, and Density Effects on Development Rate and  
676 Survival of *Aedes aegypti* (Diptera: Culicidae). *PLoS ONE*. 2014;9: e87468.  
677 doi:10.1371/journal.pone.0087468
- 678 28. Ezeakacha N. Environmental impacts and carry-over effects in complex life cycles: the role of different life  
679 history stages. Dissertation. 2015; Available: <http://aquila.usm.edu/dissertations/190>
- 680 29. Teng H-J, Apperson CS. Development and Survival of Immature *Aedes albopictus* and *Aedes triseriatus*  
681 (Diptera: Culicidae) in the Laboratory: Effects of Density, Food, and Competition on Response to  
682 Temperature. *J Med Entomol*. 2000;37: 40–52. doi:10.1603/0022-2585-37.1.40
- 683 30. Wiwatanaratnabutr S, Kittayapong P. Effects of temperature and Wolbachia load on life history  
684 traits of *Aedes albopictus*. *Med Vet Entomol*. 2006;20: 300–307. doi:10.1111/j.1365-2915.2006.00640.x
- 685 31. Xiao F-Z, Zhang Y, Deng Y-Q, He S, Xie H-G, Zhou X-N, et al. The effect of temperature on the extrinsic  
686 incubation period and infection rate of dengue virus serotype 2 infection in *Aedes albopictus*. *Arch Virol*.  
687 2014;159: 3053–3057. doi:10.1007/s00705-014-2051-1

- 688 32. Watts DM, Burke DS, Harrison BA, Whitmire RE, Nisalak A. Effect of temperature on the vector efficiency of  
689 *Aedes aegypti* for dengue 2 virus. *Am J Trop Med Hyg.* 1987;36: 143–152.
- 690 33. McLean DM, Clarke AM, Coleman JC, Montalbetti CA, Skidmore AG, Walters TE, et al. Vector capability of  
691 *Aedes aegypti* mosquitoes for California encephalitis and dengue viruses at various temperatures. *Can J*  
692 *Microbiol.* 1974;20: 255–262. doi:10.1139/m74-040
- 693 34. Carrington LB, Armijos MV, Lambrechts L, Scott TW. Fluctuations at a low mean temperature accelerate  
694 dengue virus transmission by *Aedes aegypti*. *PLoS Negl Trop Dis.* 2013;7: e2190.  
695 doi:10.1371/journal.pntd.0002190
- 696 35. Davis NC. The effect of various temperatures in modifying the extrinsic incubation period of the yellow fever  
697 virus in *Aedes aegypti*. *Am J Epidemiol.* 1932;16: 163–176.
- 698 36. McLean DM, Miller MA, Grass PN. Dengue virus transmission by mosquitoes incubated at low temperatures.  
699 *Mosq News.* 1975; Available: <http://agris.fao.org/agris-search/search.do?recordID=US19760088008>
- 700 37. Focks DA, Daniels E, Haile DG, Keesling JE. A simulation model of the epidemiology of urban dengue fever:  
701 literature analysis, model development, preliminary validation, and samples of simulation results. *Am J Trop*  
702 *Med Hyg.* 1995;53: 489–506.
- 703 38. Alto BW, Bettinardi D. Temperature and dengue virus infection in mosquitoes: independent effects on the  
704 immature and adult stages. *Am J Trop Med Hyg.* 2013;88: 497–505. doi:10.4269/ajtmh.12-0421
- 705 39. Stewart Ibarra AM, Ryan SJ, Beltrán E, Mejía R, Silva M, Muñoz Á. Dengue vector dynamics (*Aedes aegypti*)  
706 influenced by climate and social factors in Ecuador: implications for targeted control. *PLoS ONE.* 2013;8:  
707 e78263. doi:10.1371/journal.pone.0078263
- 708 40. Brady OJ, Golding N, Pigott DM, Kraemer MUG, Messina JP, Reiner Jr RC, et al. Global temperature  
709 constraints on *Aedes aegypti* and *Ae. albopictus* persistence and competence for dengue virus transmission.  
710 *Parasit Vectors.* 2014;7: 338. doi:10.1186/1756-3305-7-338
- 711 41. Carlson CJ, Dougherty ER, Getz W. An Ecological Assessment of the Pandemic Threat of Zika Virus. *PLoS*  
712 *Negl Trop Dis.* 2016;10: e0004968. doi:10.1371/journal.pntd.0004968
- 713 42. Samy AM, Thomas SM, Wahed AAE, Cohoon KP, Peterson AT, Samy AM, et al. Mapping the global  
714 geographic potential of Zika virus spread. *Mem Inst Oswaldo Cruz.* 2016;111: 559–560. doi:10.1590/0074-  
715 02760160149
- 716 43. Wesolowski A, Qureshi T, Boni MF, Sundsøy PR, Johansson MA, Rasheed SB, et al. Impact of human  
717 mobility on the emergence of dengue epidemics in Pakistan. *Proc Natl Acad Sci.* 2015; 201504964.  
718 doi:10.1073/pnas.1504964112
- 719 44. Liu-Helmersson J, Stenlund H, Wilder-Smith A, Rocklöv J. Vectorial Capacity of *Aedes aegypti*: Effects of  
720 Temperature and Implications for Global Dengue Epidemic Potential. *PLoS ONE.* 2014;9: e89783.  
721 doi:10.1371/journal.pone.0089783
- 722 45. Caminade C, Turner J, Metelmann S, Hesson JC, Blagrove MSC, Solomon T, et al. Global risk model for  
723 vector-borne transmission of Zika virus reveals the role of El Niño 2015. *Proc Natl Acad Sci.* 2017;114: 119–  
724 124. doi:10.1073/pnas.1614303114
- 725 46. Bogoch II, Brady OJ, Kraemer MUG, German M, Creatore MI, Kulkarni MA, et al. Anticipating the  
726 international spread of Zika virus from Brazil. *The Lancet.* 2016;387: 335–336. doi:10.1016/S0140-  
727 6736(16)00080-5

- 728 47. Briere J-F, Pracros P, Le Roux A-Y, Pierre J-S. A novel rate model of temperature-dependent development for  
729 arthropods. *Environ Entomol.* 1999;28: 22–29.
- 730 48. Li J, Blakeley D, Smith? RJ. The Failure of  $R_0$ . *Comput Math Methods Med.* 2011;2011: e527610.  
731 doi:10.1155/2011/527610
- 732 49. Lambrechts L, Paaijmans KP, Fansiri T, Carrington LB, Kramer LD, Thomas MB, et al. Impact of daily  
733 temperature fluctuations on dengue virus transmission by *Aedes aegypti*. *Proc Natl Acad Sci.* 2011;108:  
734 7460–7465. doi:10.1073/pnas.1101377108
- 735 50. Rohatgi A. WebPlotDigitizer [Internet]. 2015. Available: <http://arohatgi.info/WebPlotDigitizer>
- 736 51. Johnson LR, Ben-Horin T, Lafferty KD, McNally A, Mordecai E, Paaijmans KP, et al. Understanding  
737 uncertainty in temperature effects on vector-borne disease: a Bayesian approach. *Ecology.* 2015;96: 203–213.  
738 doi:10.1890/13-1964.1
- 739 52. R Development Core Team. R: A Language and Environment for Statistical Computing [Internet]. Vienna,  
740 Austria: R Foundation for Statistical Computing; 2014. Available: <http://www.R-project.org>
- 741 53. Plummer M. rjags: Bayesian Graphical Models using MCMC [Internet]. 2016. Available: [http://CRAN.R-](http://CRAN.R-project.org/package=rjags)  
742 [project.org/package=rjags](http://CRAN.R-project.org/package=rjags)
- 743 54. Plummer M, Best N, Cowles K, Vines K. CODA: Convergence Diagnosis and Output Analysis for MCMC.  
744 2006.
- 745 55. Parton WJ, Logan JA. A model for diurnal variation in soil and air temperature. *Agric Meteorol.* 1981;23: 205–  
746 216. doi:10.1016/0002-1571(81)90105-9
- 747 56. Paaijmans KP, Heinig RL, Seliga RA, Blanford JI, Blanford S, Murdock CC, et al. Temperature variation  
748 makes ectotherms more sensitive to climate change. *Glob Change Biol.* 2013;19: 2373–2380.  
749 doi:10.1111/gcb.12240
- 750 57. Vasseur DA, DeLong JP, Gilbert B, Greig HS, Harley CDG, McCann KS, et al. Increased temperature variation  
751 poses a greater risk to species than climate warming. *Proc R Soc Lond B Biol Sci.* 2014;281: 20132612.  
752 doi:10.1098/rspb.2013.2612
- 753 58. Narasimhan R. weatherData: Get Weather Data from the Web [Internet]. 2014. Available: [https://cran.r-](https://cran.r-project.org/web/packages/weatherData/index.html)  
754 [project.org/web/packages/weatherData/index.html](https://cran.r-project.org/web/packages/weatherData/index.html)
- 755 59. Breheny P, Burchett W. visreg: Visualization of Regression Models [Internet]. 2016. Available: [https://cran.r-](https://cran.r-project.org/web/packages/visreg/index.html)  
756 [project.org/web/packages/visreg/index.html](https://cran.r-project.org/web/packages/visreg/index.html)

757

758



759 **Figure 1**

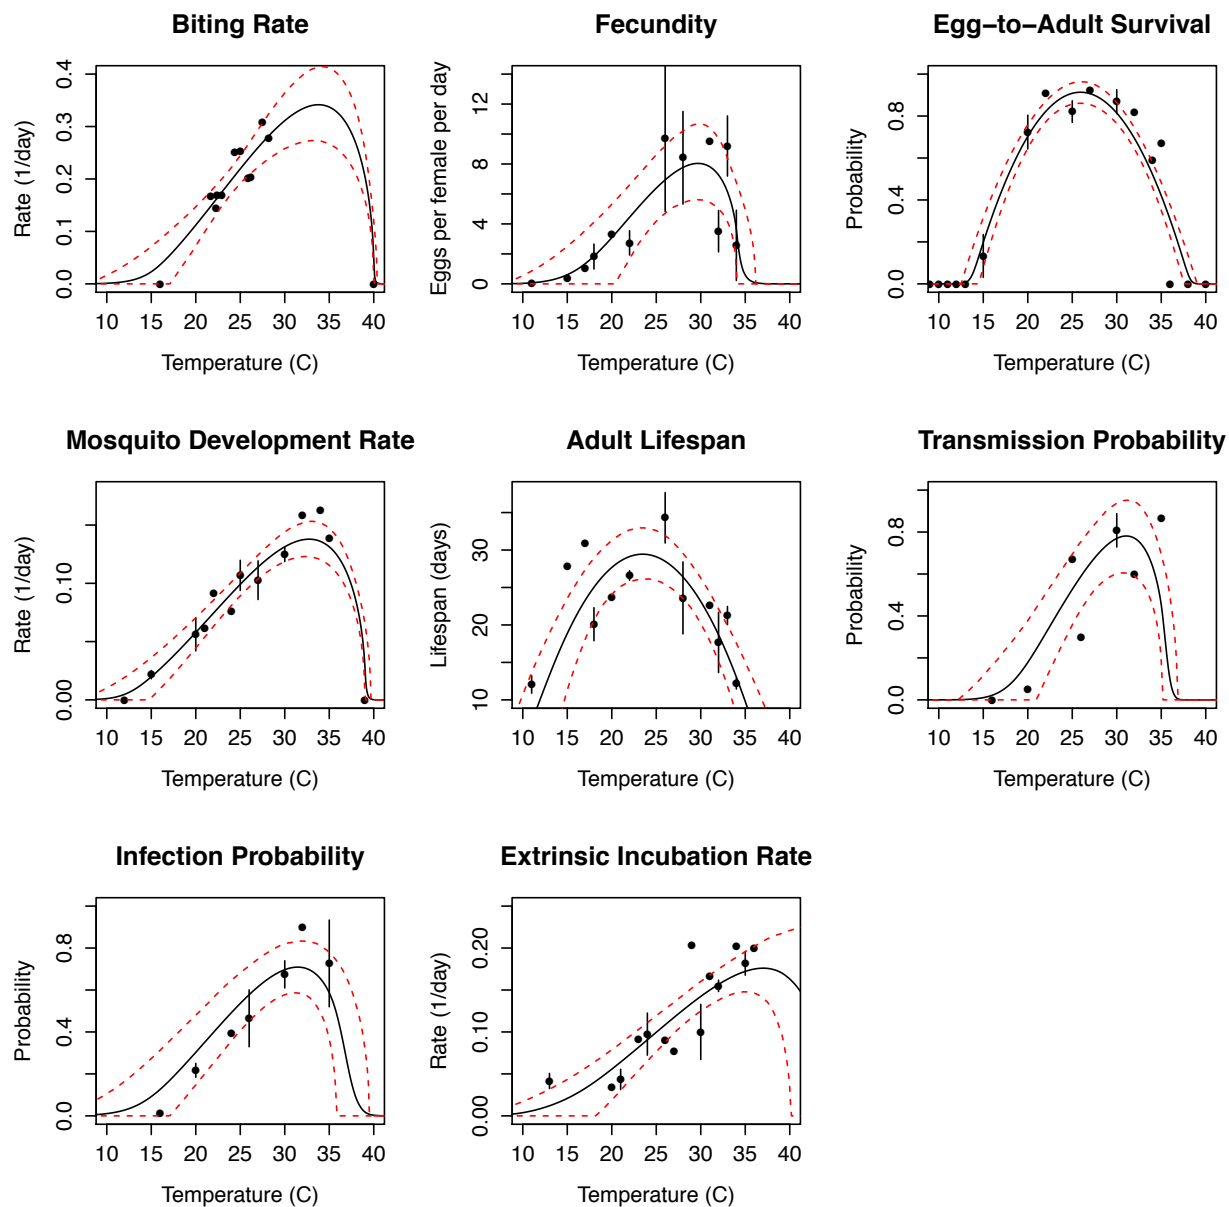

760

761

762 **Figure 2**

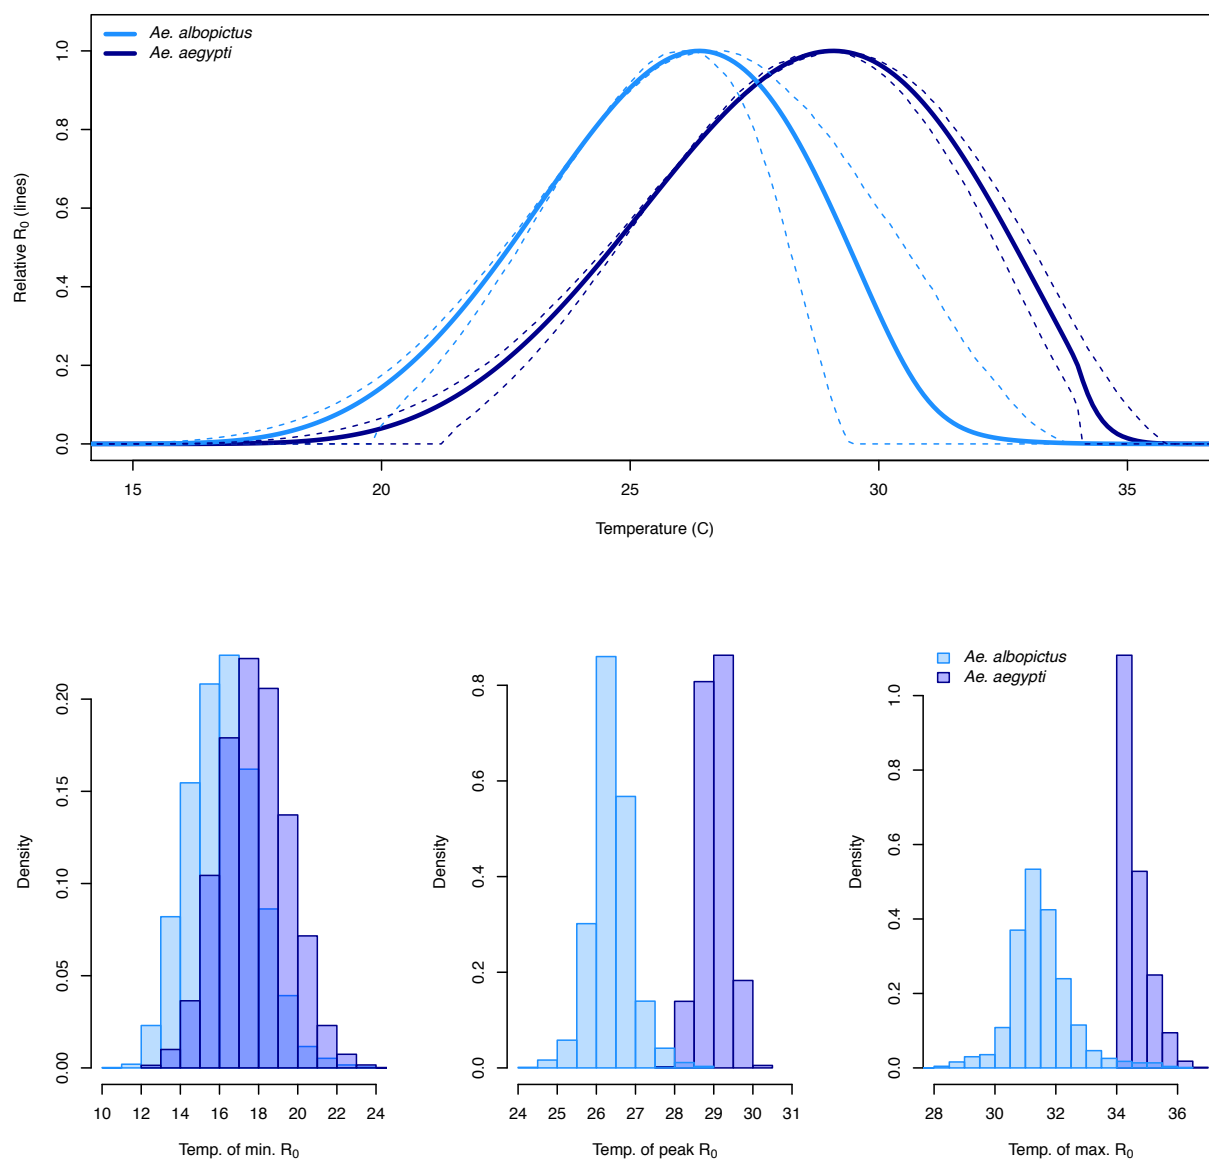

763

764

765 **Figure 3**

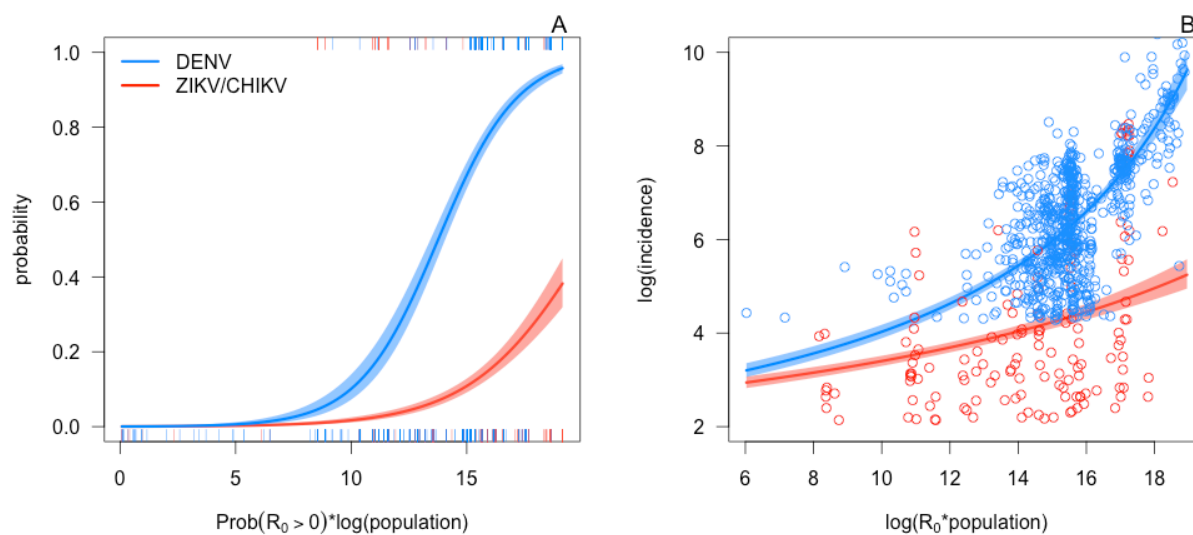

766

767

768 **Figure 4**

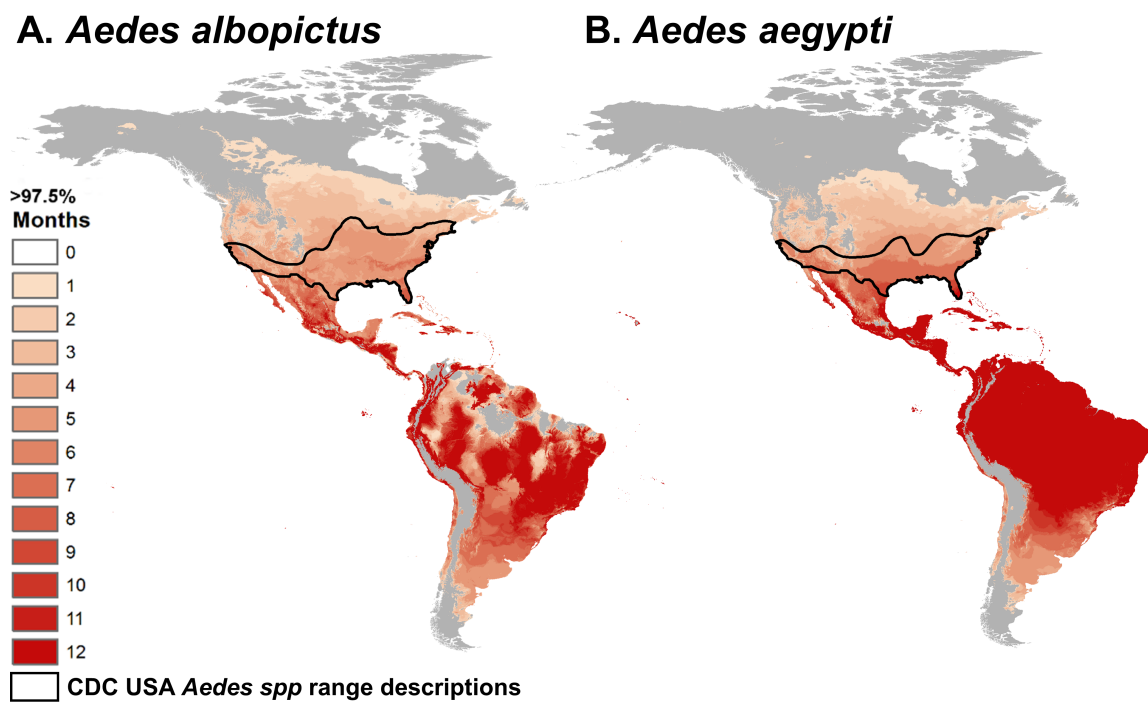

769
